# Supplementary material
Source: PubMed Central journal article supplement (PMC7966588)
Supplement: 3866_table.pdf [file 3866_table.pdf]

**On-line Table: Clinical and geometric data before and after rupture**

| Case      | Age (yr)/Sex | Location (Adjacent Artery) | Volume (mm <sup>3</sup> )     |                                | Volume Postrupture (mm <sup>3</sup> ) | Absolute Volume Change (mm <sup>3</sup> ) | Relative Volume Change (%) | Maximum Diameter (mm) |             | Surface Distance between the Aneurysm Sacs (Max/Average in mm) | Aneurysm Displacement (mm) | Time between Pre- and Postrupture |  |
|-----------|--------------|----------------------------|-------------------------------|--------------------------------|---------------------------------------|-------------------------------------------|----------------------------|-----------------------|-------------|----------------------------------------------------------------|----------------------------|-----------------------------------|--|
|           |              |                            | Prerupture (mm <sup>3</sup> ) | Postrupture (mm <sup>3</sup> ) |                                       |                                           |                            | Pre-/Postrupture      | Postrupture |                                                                |                            |                                   |  |
| 1         | 68/M         | Basilar                    | 1132                          | 1565                           | 432.8                                 | 38                                        | 17.3/19.9                  | 2.0/0.65              | 0.0         | 0 yr, 183 d                                                    |                            |                                   |  |
| 2         | 72/M         | Acoma                      | 1862                          | 2475                           | 613                                   | 33                                        | 21.1/23.1                  | 2.4/0.08              | 8.9         | 0 yr, 72 d                                                     |                            |                                   |  |
| 3         | 70/M         | Pcoma                      | 31                            | 55.5                           | 24.4                                  | 79                                        | 5.22/6.68                  | 1.4/0.5               | 0.0         | 2 yr, 323 d                                                    |                            |                                   |  |
| 4         | 48/F         | MCA                        | 107                           | 119.3                          | 12.3                                  | 12                                        | 12.8/12.4                  | 1.3/0.1               | 5.8         | 0 yr, 151 d                                                    |                            |                                   |  |
| 5         | 58/F         | MCA                        | 35.7                          | 98.4                           | 62.7                                  | 176                                       | 5.78/7.71                  | 4.0/1.0               | 1.2         | 3 yr, 148 d                                                    |                            |                                   |  |
| 6         | 61/F         | Basilar                    | 290.7                         | 278.7                          | -12                                   | -4                                        | 11.9/11.6                  | 0.4/0.0               | 0.6         | 0 yr, 34 d                                                     |                            |                                   |  |
| 7         | 51/F         | Pcoma                      | 1.9                           | 17.4                           | 15.5                                  | 832                                       | 5.47/11.6                  | 11/1.2                | 0.0         | 4 yr, 1 d                                                      |                            |                                   |  |
| 8         | 40/F         | Anterior choroidal         | 110.5                         | 187.2                          | 76.8                                  | 70                                        | 11.4/12.5                  | 2.4/0.3               | 2.5         | 0 yr, 14 d                                                     |                            |                                   |  |
| 9         | 76/M         | Basilar                    | 737.8                         | 717.2                          | -20.6                                 | -3                                        | 13.5/14.5                  | 1.2/0.24              | 0.0         | 0 yr, 302 d                                                    |                            |                                   |  |
| Median    | 61           |                            | 110.5                         | 187.2                          | 24.4                                  | 38                                        | 11.9/12.4                  | 3.1/0.45              | 0.6         | 0 yr, 183 d                                                    |                            |                                   |  |
| Mean (SD) | 60           |                            | 479 (646)                     | 613 (855)                      | 134 (227)                             | 137 (266)                                 | 11.6/13.3 (5.47/5.29)      | 2.1 (1.0)/0.45 (0.4)  | 2.2 (2.6)   | 1 yr, 127 d (1 yr, 199 d)                                      |                            |                                   |  |

**Note:**—Pcoma indicates posterior communicating artery; Acoma, anterior communicating artery; Max, maximum; d, day.
